# Supplementary material
Source: publisher figshare collection journal article supplement (https://springernature.figshare.com/articles/dataset/_/23963208)
Supplement: Supplementary file 3 [file 1]

## a) Glycemia

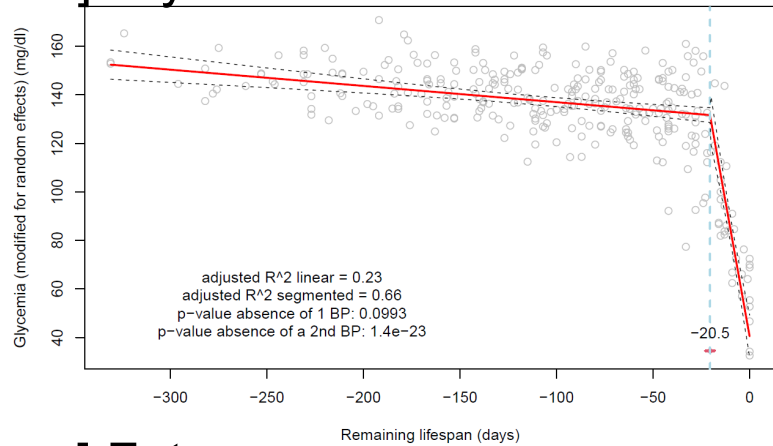

## b) Body weight

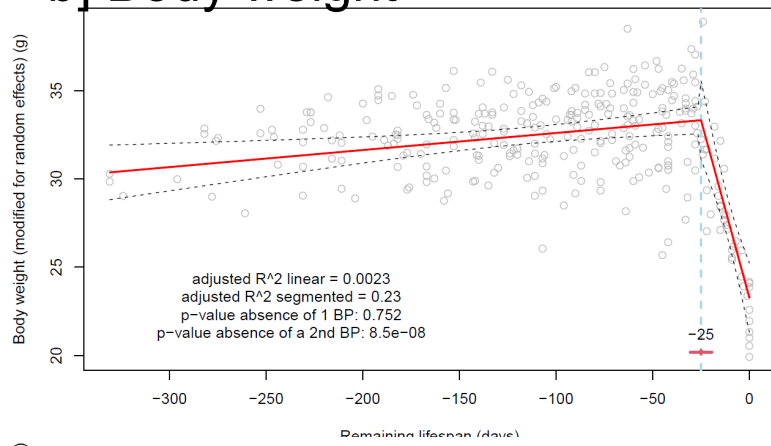

## c) Fat mass

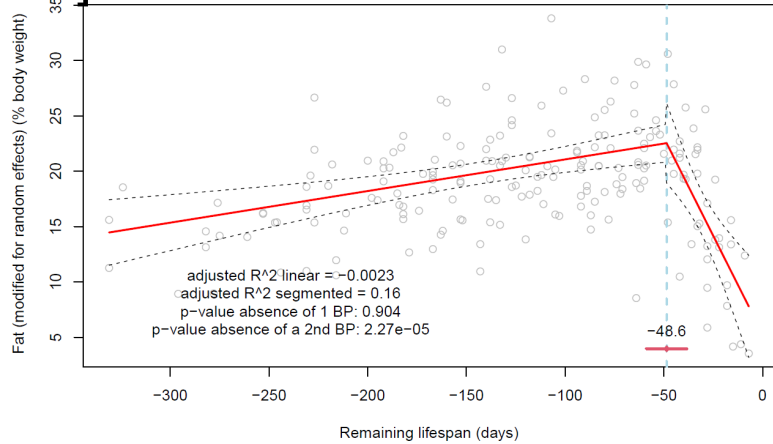

## d) Energy balance

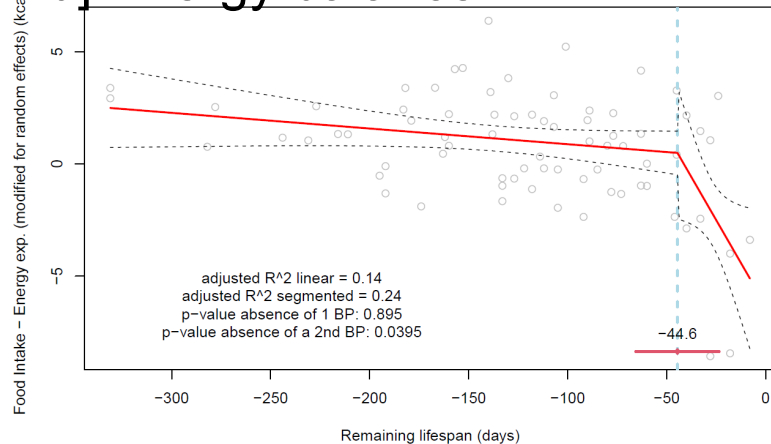

## e) Food intake

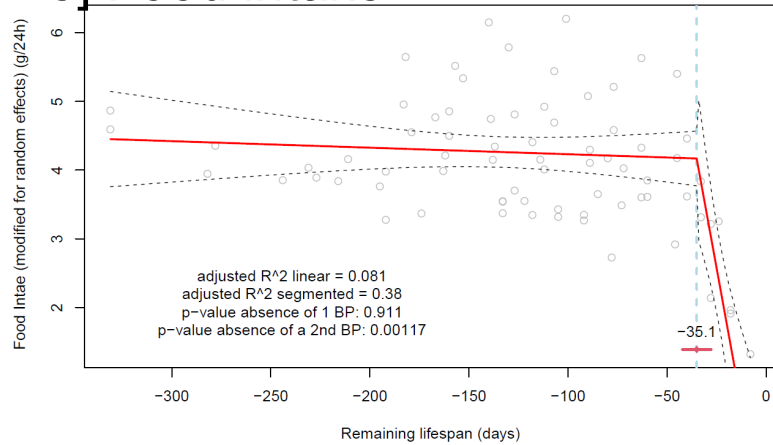

## f) Locomotor activity

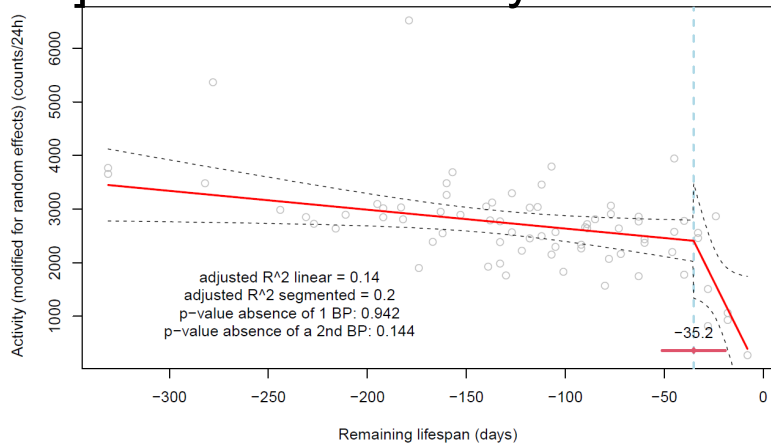

## g) Energy expenditure

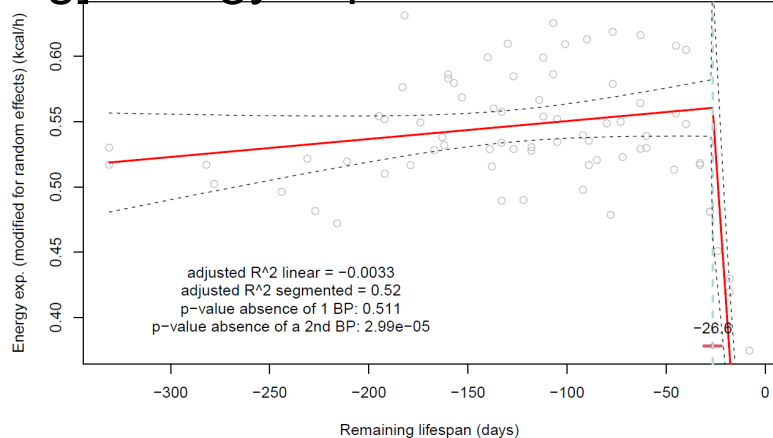

## h) Rectal temperature

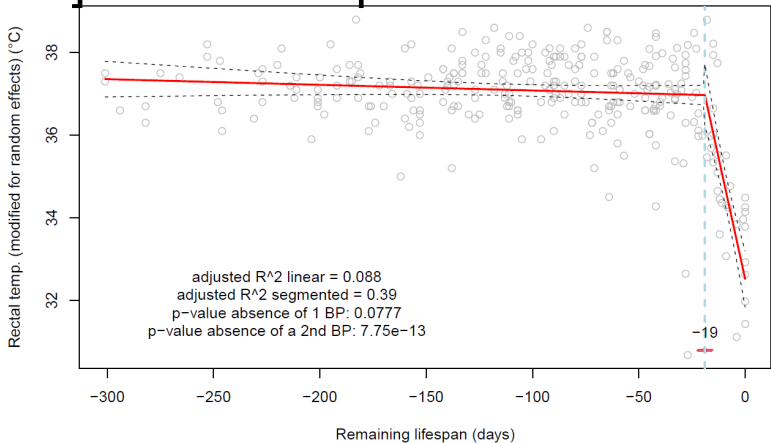

Figure 3
