# Supplementary material
Source: publisher figshare collection journal article supplement (https://springernature.figshare.com/articles/dataset/_/23963208)
Supplement: Supplementary file 6 [file 1]

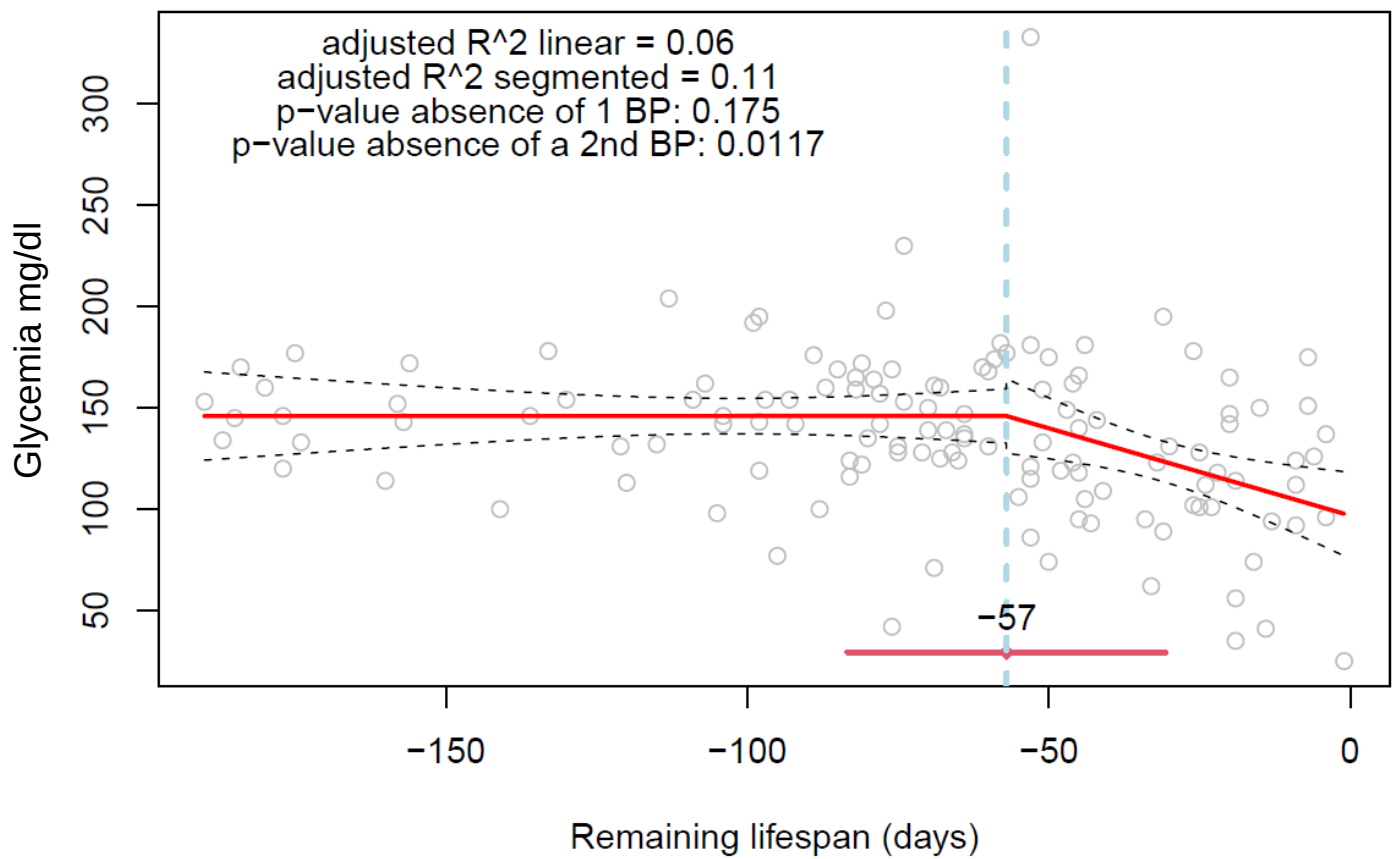

**Data and Code from: Fasting Blood Glucose as a Predictor of Mortality: Lost in Translation. 10.5281/ zenodo.5167639**

Palliyaguru, Dushani L; Shiroma, Eric J; Nam, John K; Duregon, Eleonora; Vieira Ligo Teixeira, Camila; Price, Nathan L; Bernier, Michel; Camandola, Simonetta; Vaughan, Kelli L; Colman, Ricki J; Deighnan, Andrew; Korstanje, Ron; Peters, Luanne L; Dickinson, Stephanie L; Ejima, Keisuke; Simonsick, Eleanor M; Launer, Lenore J; Chia, Chee W; Egan, Josephine; Allison, David B; Churchill, Gary A; Anderson, Rozalyn M; Ferrucci, Luigi; Mattison, Julie A; de Cabo, Rafael

Figure sup 2
