# Supplementary material
Source: publisher figshare collection journal article supplement (https://springernature.figshare.com/articles/dataset/_/23963208)

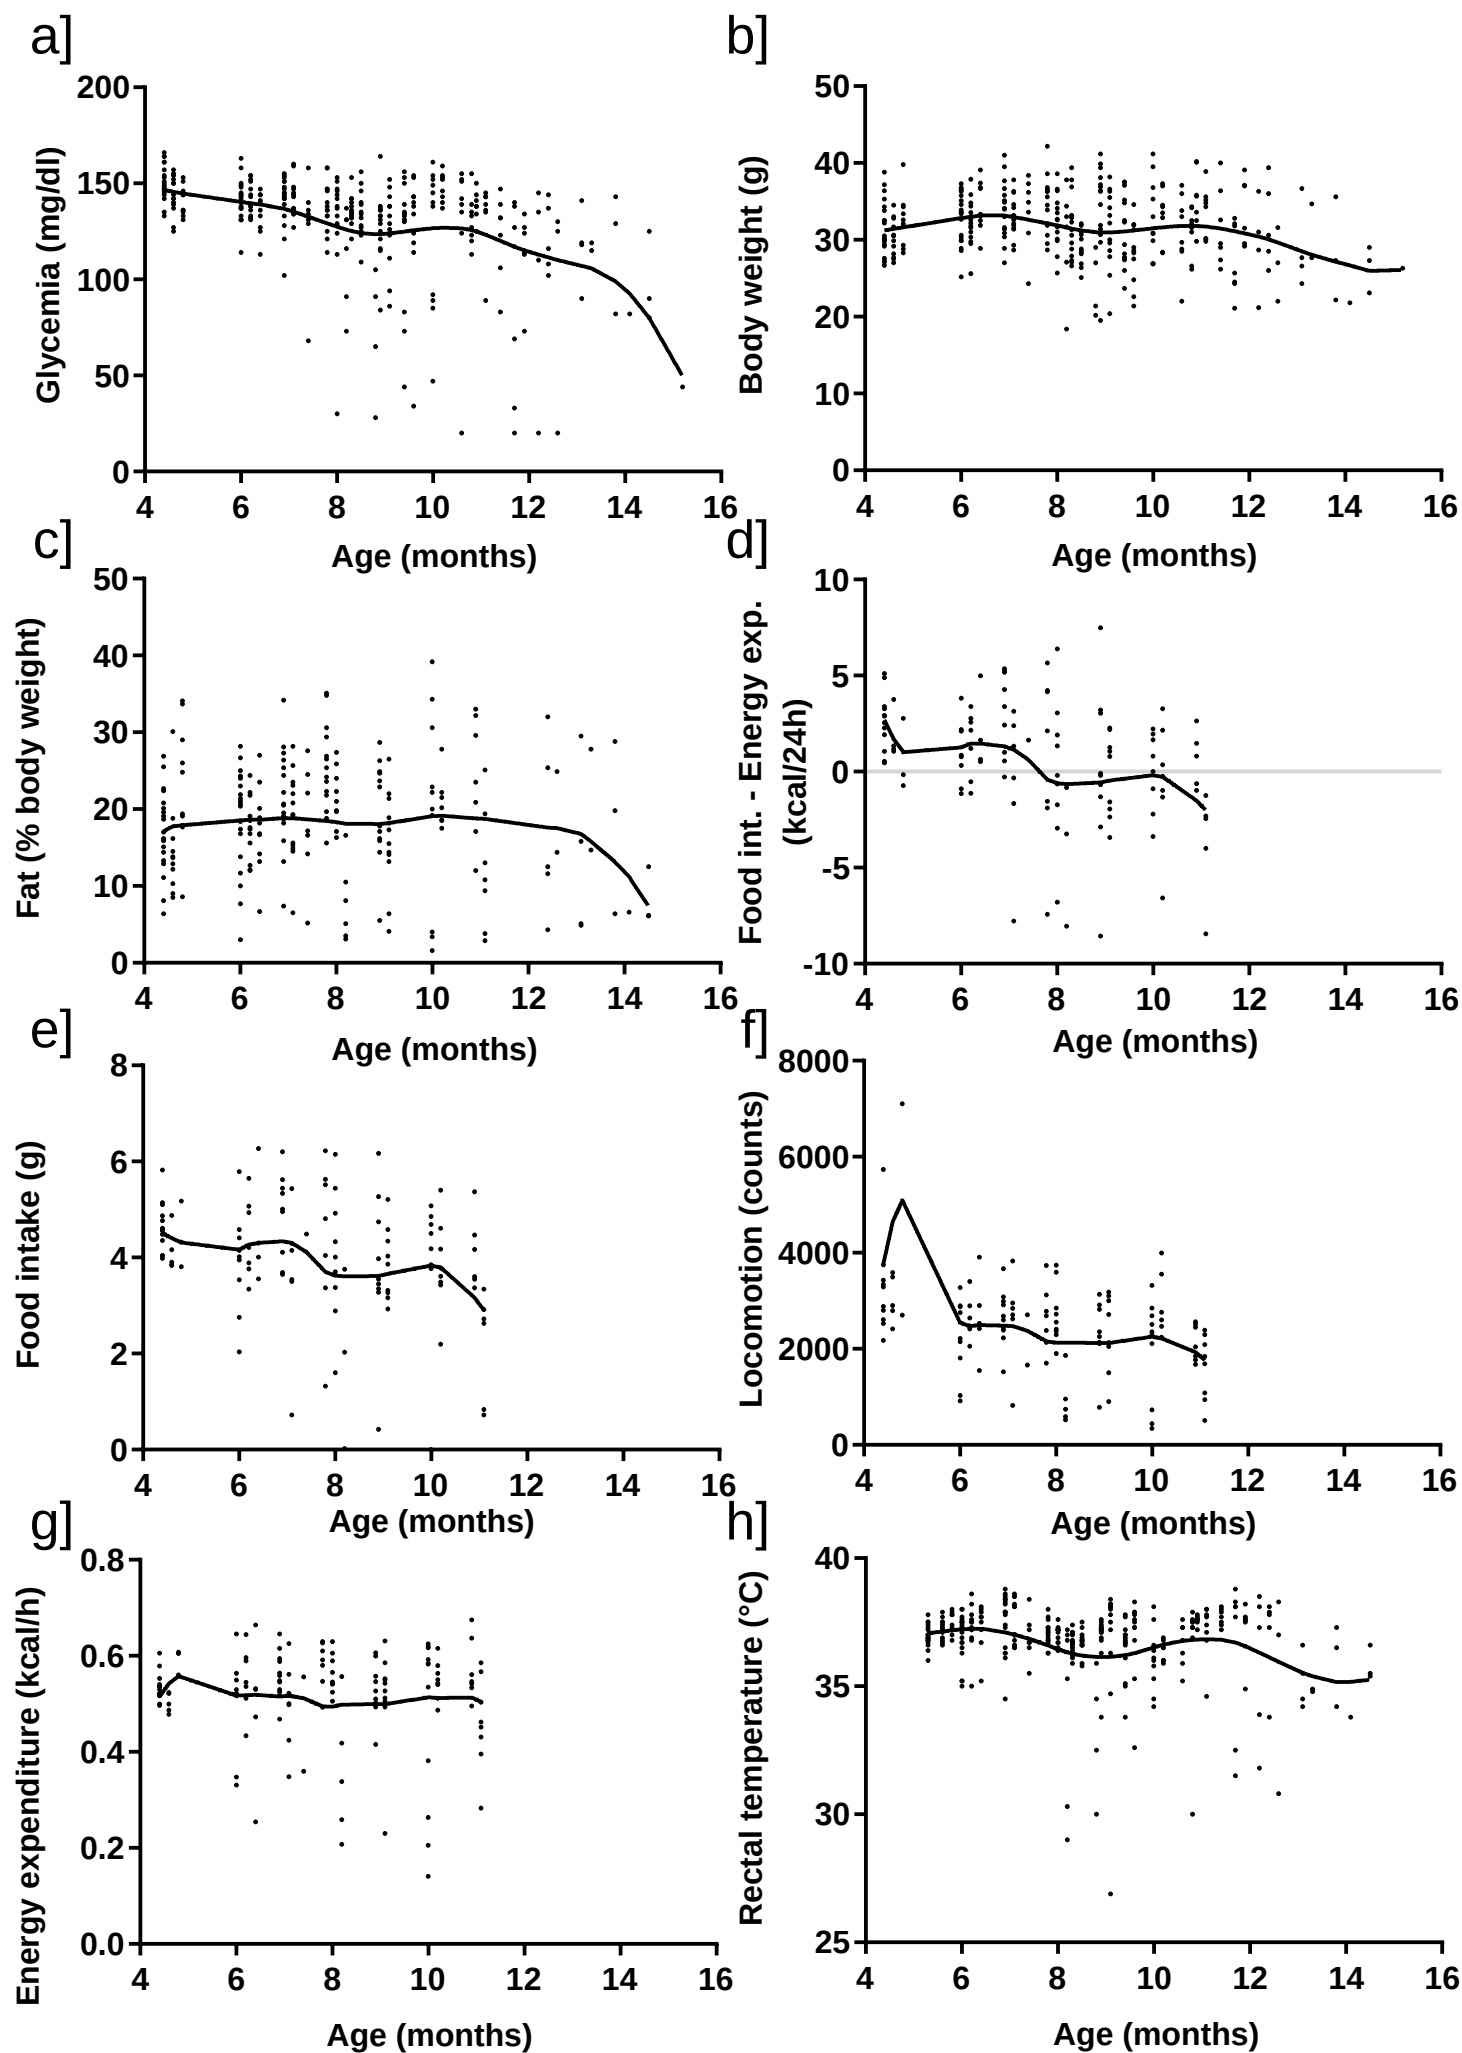

Figure sup 1

Supplement: Supplementary file 1 [file 1]

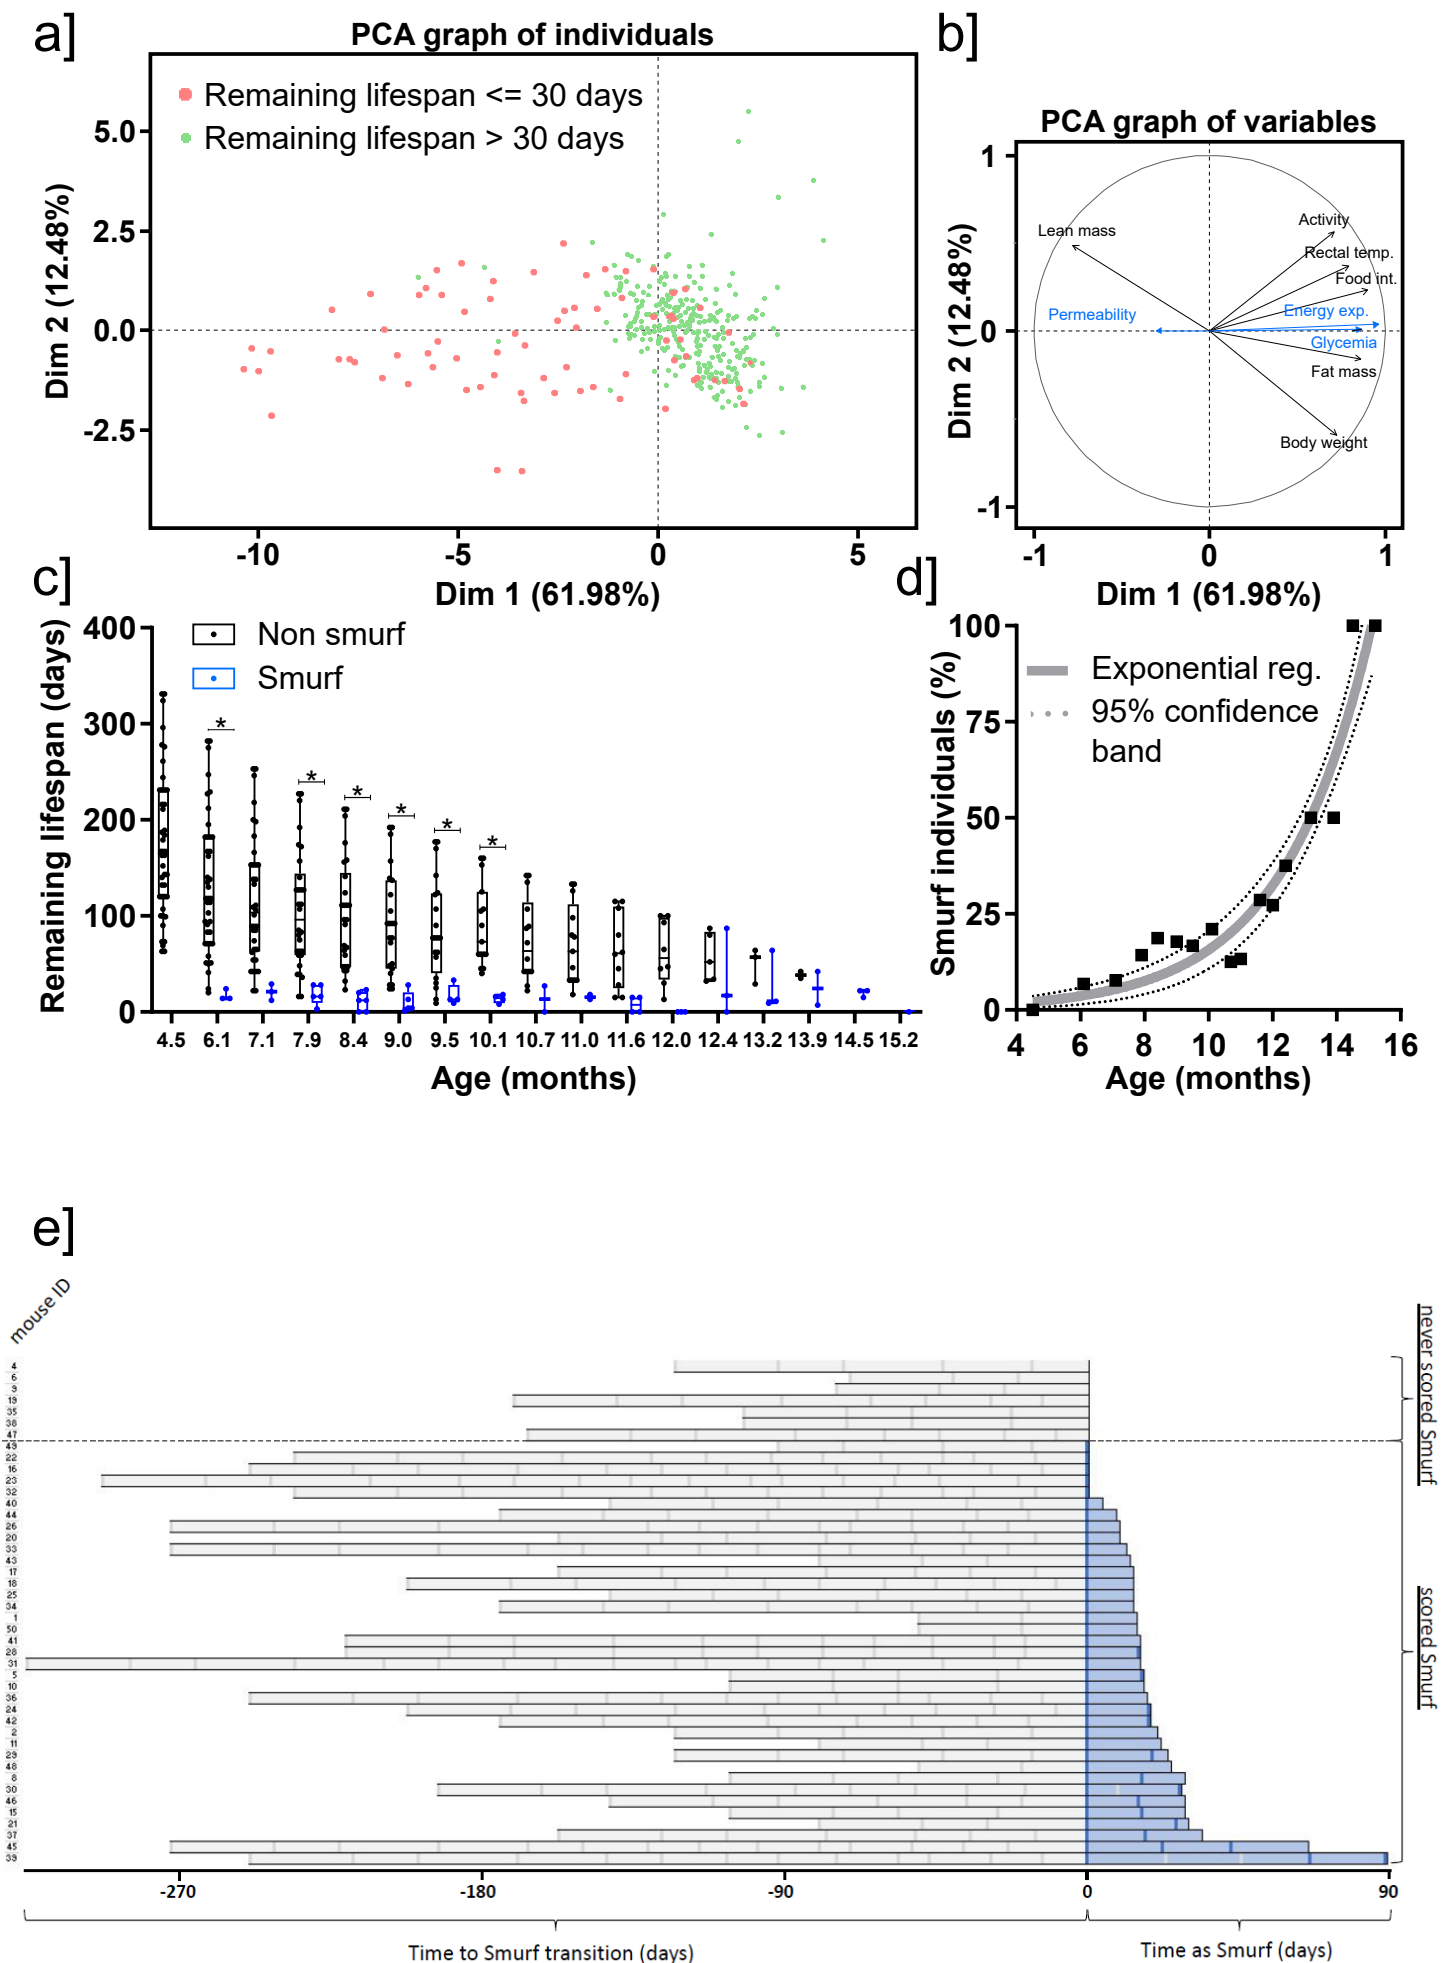

Figure 4

Supplement: Supplementary file 2 [file 1]

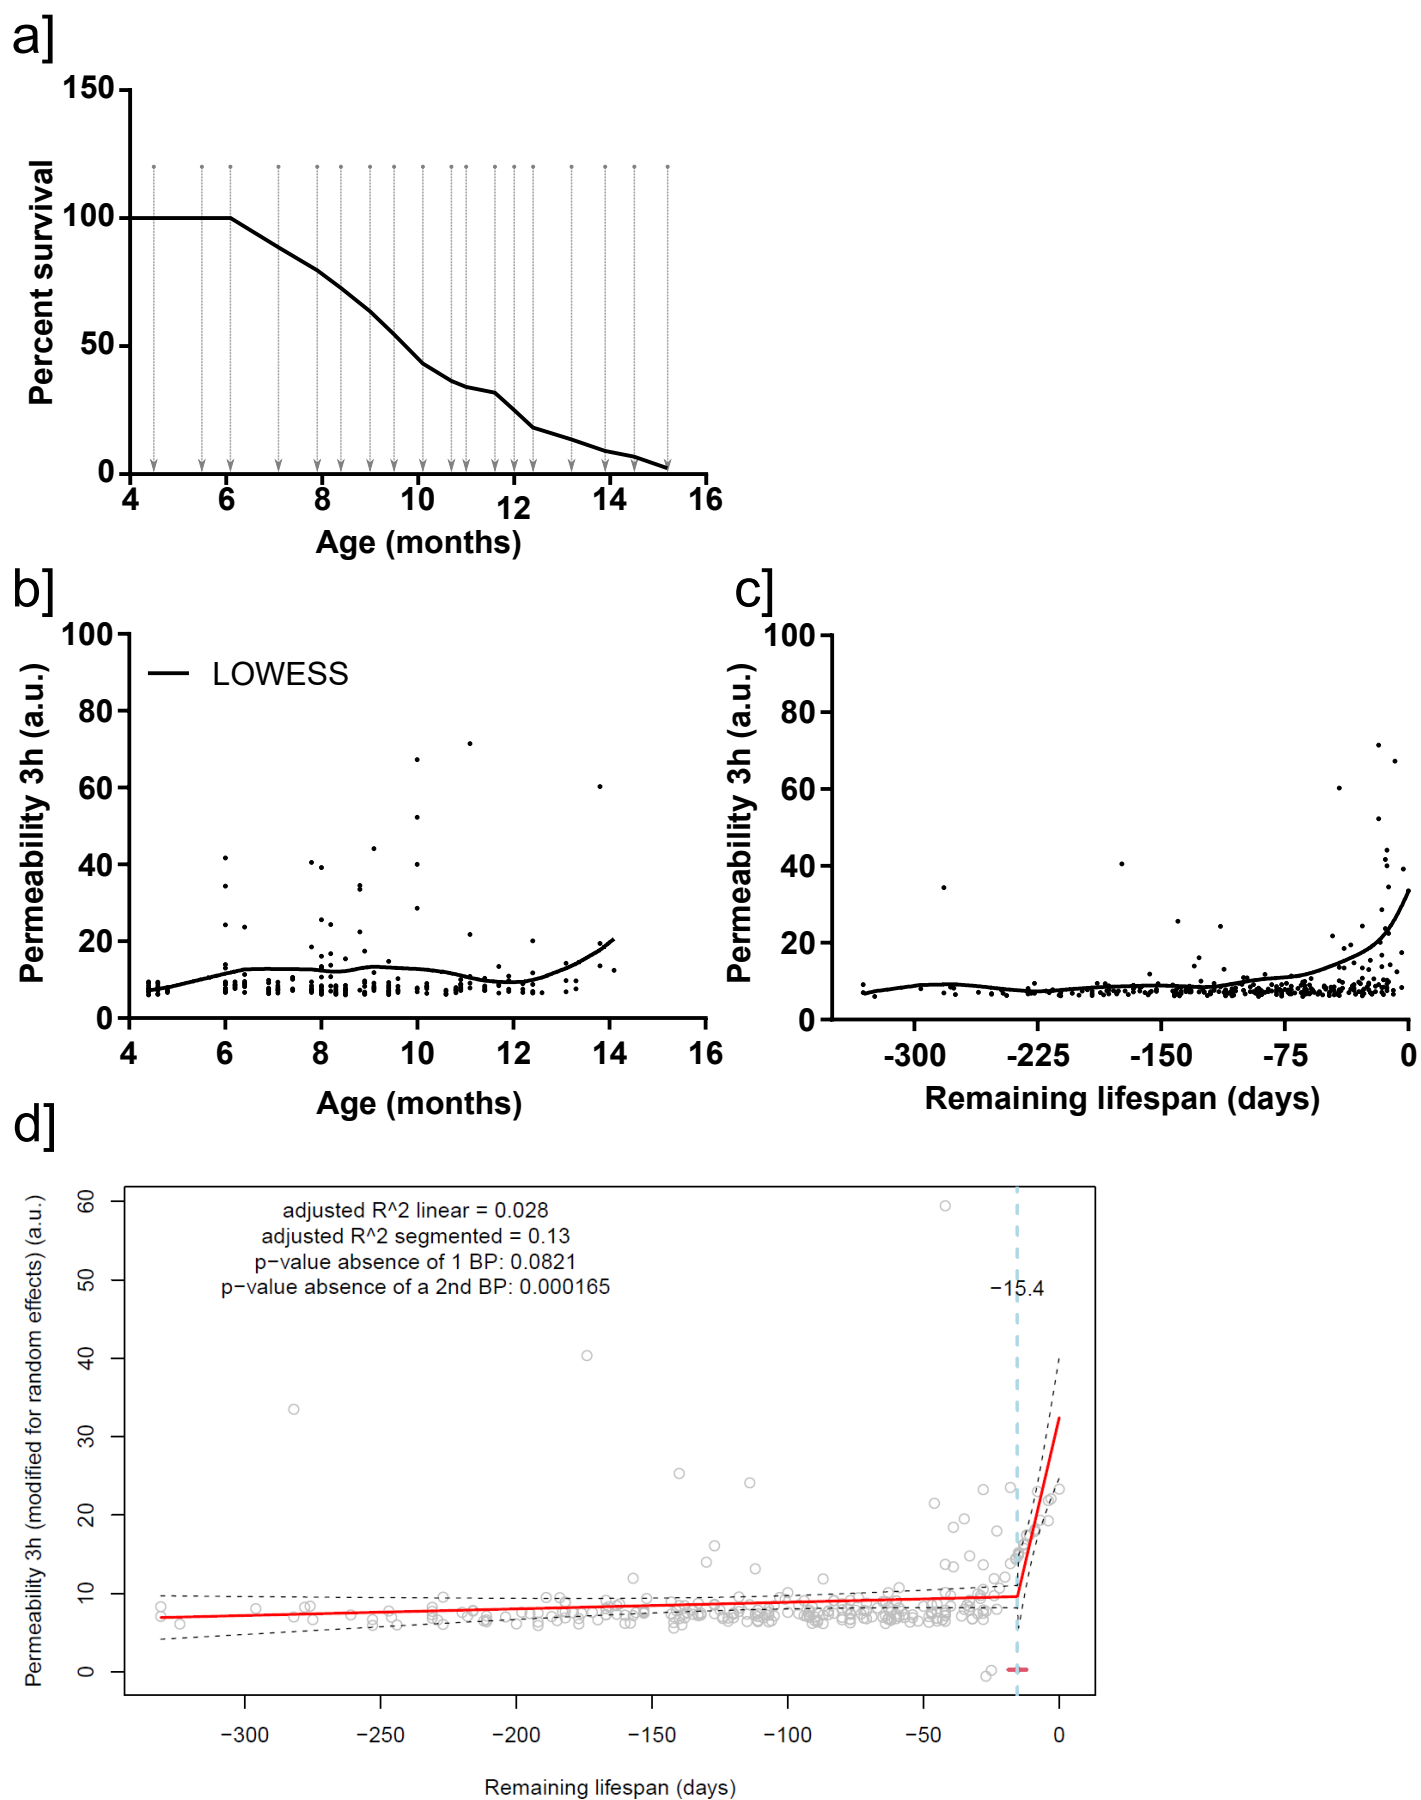

Figure 1

Supplement: Supplementary file 4 [file 1]

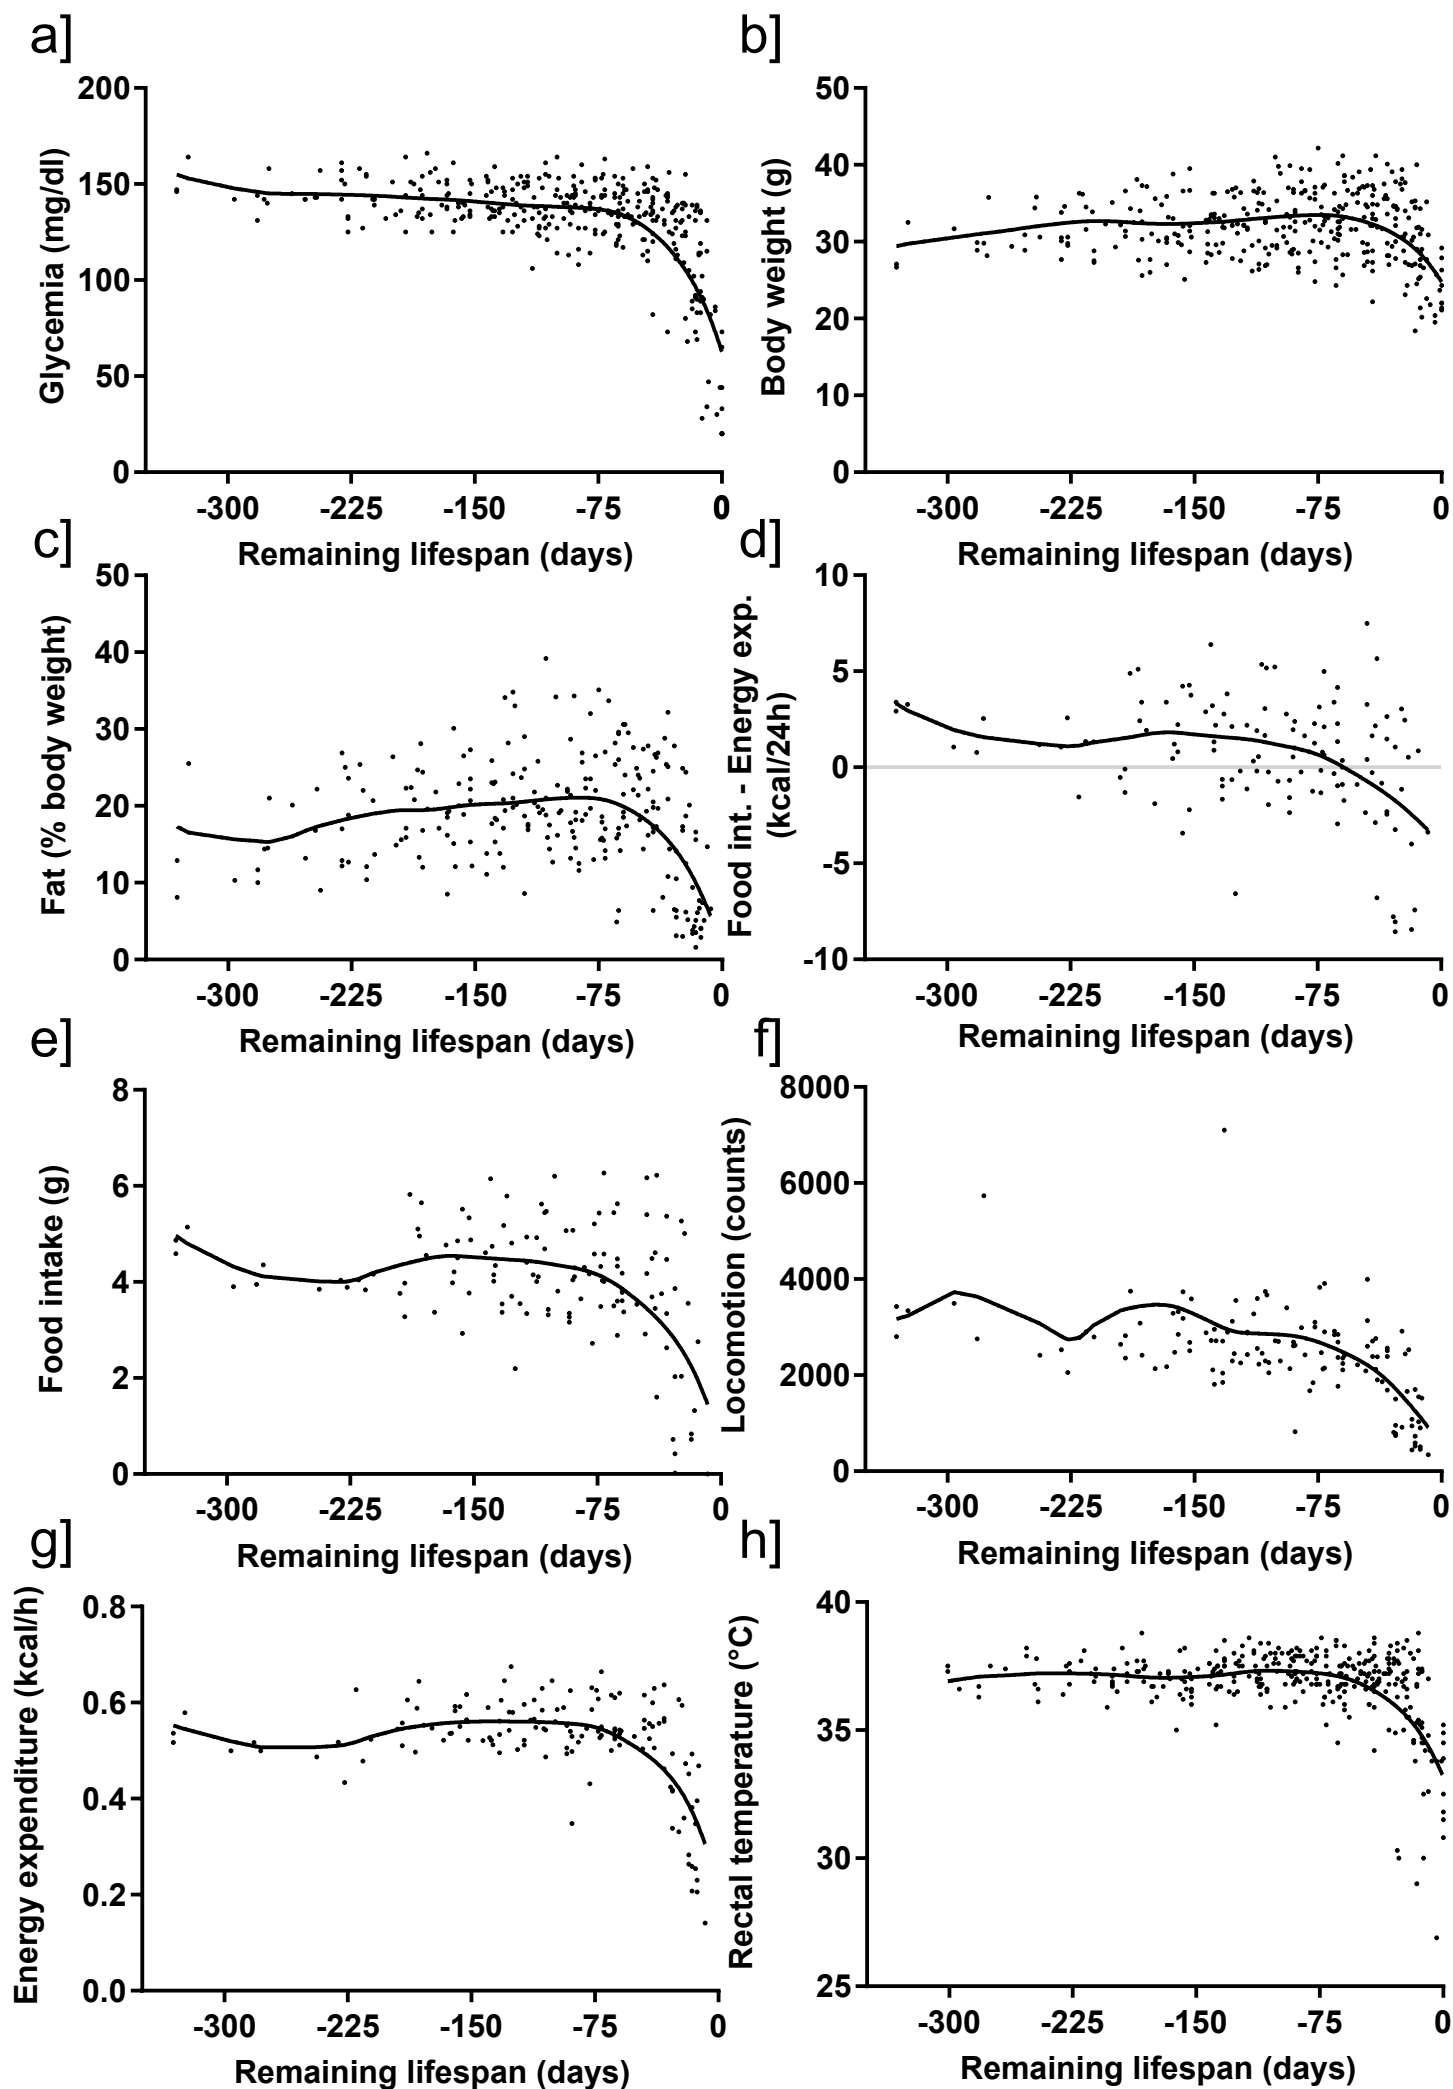

Figure 2

Supplement: Supplementary file 5 [file 1]
